# Supplementary material for: The interaction between STAT3 and nAChRα1 interferes with nicotine-induced atherosclerosis via Akt/mTOR signaling cascade
Source: publisher site journal article supplement (doi:10.18632/aging.102296), 2019-10-14
Supplement: Supplementary file [file aging-v11i19-102296-supplementary-material-SD1.pdf]

## SUPPLEMENTARY FIGURES

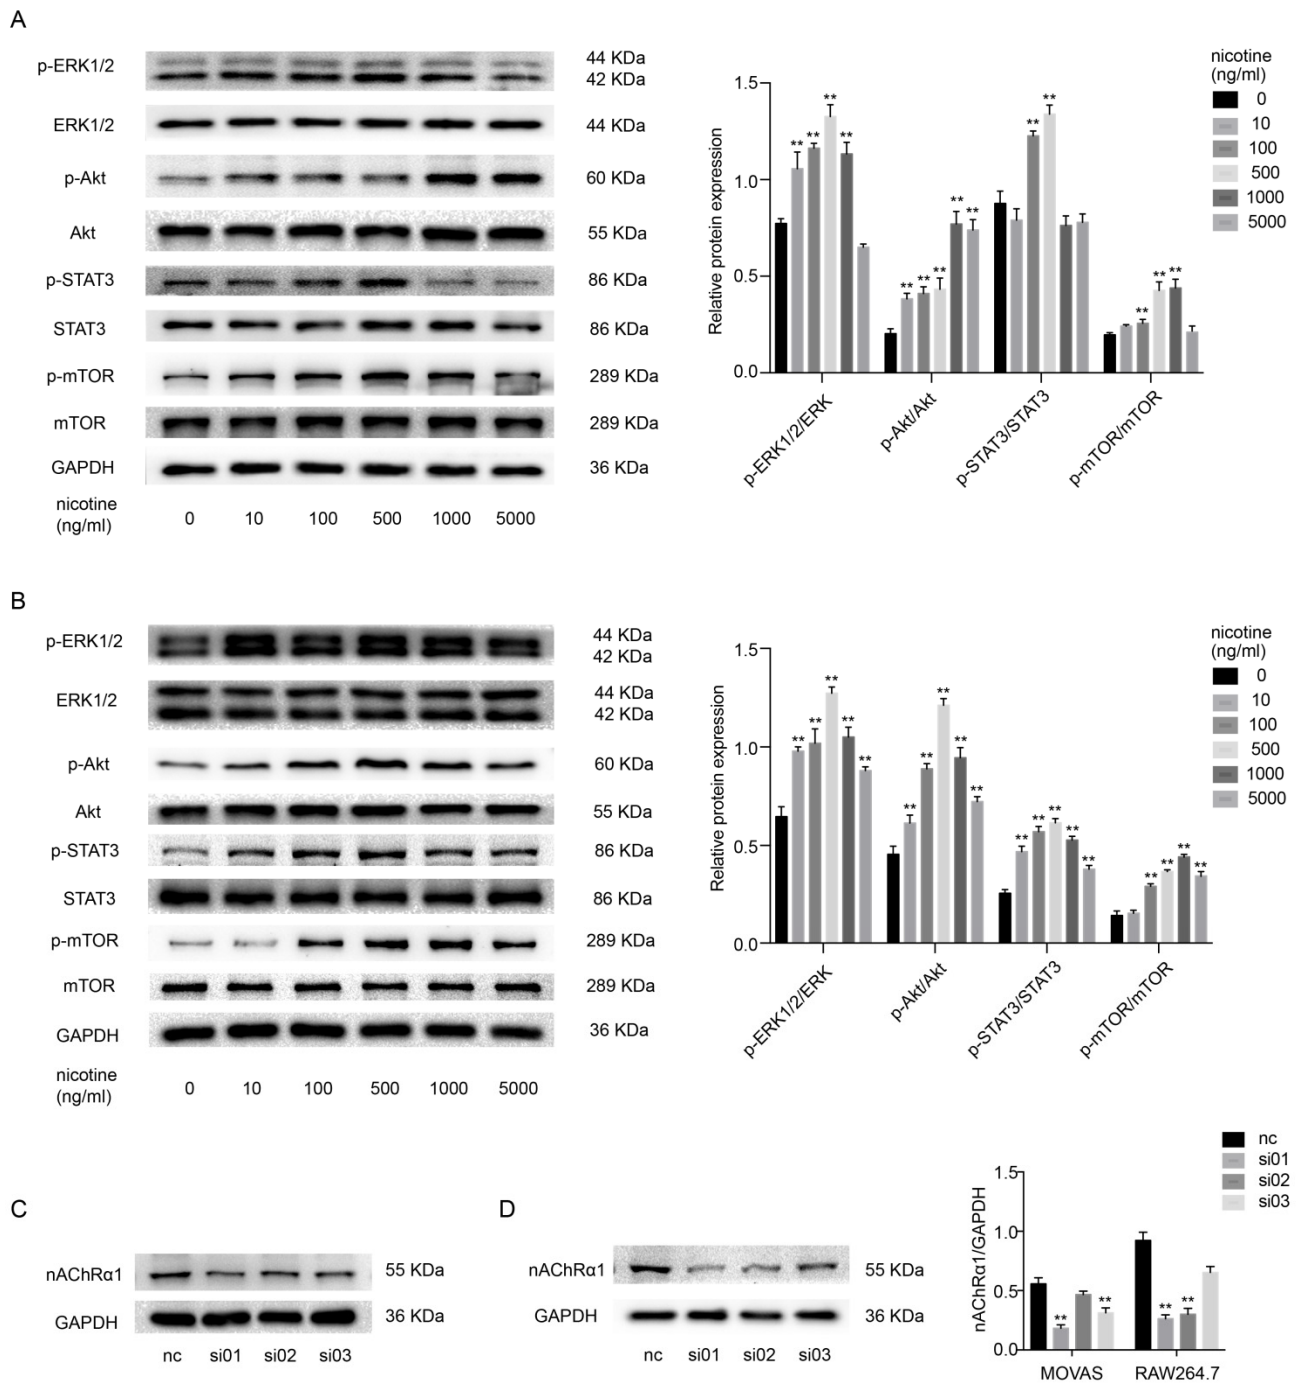

**Supplementary Figure 1. The determination of the optimal nicotine concentration and siRNA targeting the nAChR $\alpha$ 1 gene.** (A) Nicotine stimulated the phosphorylation of STAT3, ERK1/2, Akt and mTOR in MOVAS cells. Two cell lines were treated with nicotine at the concentration of 0, 10, 100, 500, 1000, 5000ng/ml for 6 hours. The expression and activation of STAT3, ERK1/2, Akt and mTOR were detected by western blot. (B) Nicotine enhanced the activation of STAT3, ERK1/2, Akt and mTOR in RAW264.7 cells. (C) The effect of the siRNA targeting the nAChR $\alpha$ 1 gene in MOVAS cells. (D) The effect of siRNA targeting nAChR $\alpha$ 1 gene in RAW264.7 cells. Data were presented as mean  $\pm$  SD. \* $p$  < 0.05, \*\* $p$  < 0.01 vs. the control group. Each experiment was performed three times.

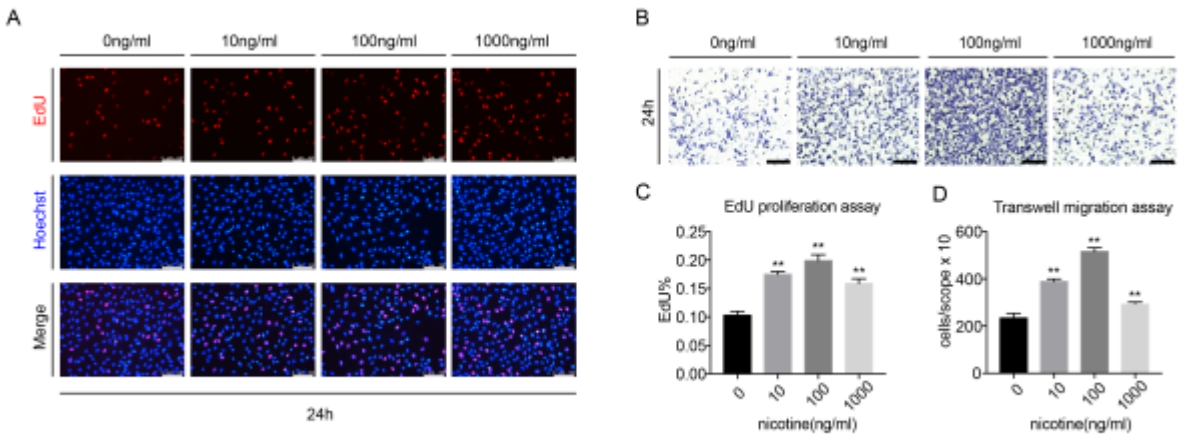

Supplementary Figure 2

**Supplementary Figure 2. Nicotine promotes the migration and proliferation of MOVAS cells in a concentration-dependent manner.** (A) The proliferation of MOVAS cells under different concentrations of nicotine exposure detected by EdU assay. Magnification, 200×; bars, 100  $\mu$ m. (B) The migration of MOVAS cells under different concentrations of nicotine exposure detected by Transwell assay. Magnification, 100×; bars, 250  $\mu$ m. (C) The statistical analysis of EdU assay. (D) The statistical analysis of Transwell assay. Data were presented as mean  $\pm$  SD. \* $p$  < 0.05, \*\* $p$  < 0.01 vs. the control group. Each experiment was performed three times.
