# Supplementary material for: The interaction between STAT3 and nAChRα1 interferes with nicotine-induced atherosclerosis via Akt/mTOR signaling cascade
Source: publisher site journal article supplement (doi:10.18632/aging.102296), 2019-10-14
Supplement: Supplementary file [file aging-v11i19-102296-supplementary-material-SD2.pdf]

## SUPPLEMENTARY TABLES

**Supplementary Table 1. The baseline characteristics of *ApoE*<sup>-/-</sup> mice.**

|                            | NCD           | HFD             | HFD+Nicotine     | HFD+Nicotine+AG490 |
|----------------------------|---------------|-----------------|------------------|--------------------|
| Weight gain, g             | 13.32±0.373   | 5.78±0.872*     | 6.08±0.664*      | 4.77±0.874*&       |
| SBP, mmHg                  | 99.73±4.945   | 104.14±7.126    | 108.28±4.030*    | 106±5.195*         |
| Triglycerides, mmol/L      | 0.966±0.304   | 0.789±0.201*    | 0.791±0.221      | 0.801±0.192        |
| Total cholesterol, mmol/L  | 18.128±3.018  | 34.376±3.174*   | 36.124±4.769*    | 35.927±2.981*      |
| HDL-C, mmol/L              | 1.709±0.183   | 2.833±0.327*    | 2.847±0.402*     | 2.862±0.318*       |
| LDL-C, mmol/L              | 9.263±0.635   | 8.128±0.609     | 8.603±0.647      | 9.017±0.597        |
| Fast blood glucose, mmol/L | 5.64±0.905    | 7.26±1.025*     | 7.37±0.843*      | 7.43±0.709*        |
| Blood uric acid, μmol/L    | 95.847±26.328 | 108.932±36.477* | 121.004±52.937*# | 112.382±35.250*    |

NCD, Normal chow diet, HFD, High-fat diet. SBP, systolic blood pressure; HDL-C, high-density lipoprotein cholesterol; LDL-C, low-density lipoprotein cholesterol. Data were presented as mean ± SD, \*p <0.01 vs. the NCD group, #p <0.05 vs. the HFD group, &p <0.05 vs. the HFD+Nicotine group. (n=10).

**Supplementary Table 2. The baseline characteristics of *ApoE*<sup>-/-</sup> mice.**

|                            | NC-AAV9+Nicotine | α1-AAV9+Nicotine |
|----------------------------|------------------|------------------|
| Weight gain, g             | 5.07±0.812       | 5.42±0.657       |
| SBP, mmHg                  | 100.30±5.623     | 105.25±3.980     |
| Triglycerides, mmol/L      | 0.741±0.182      | 0.825±0.235      |
| Total cholesterol, mmol/L  | 37.248±3.081     | 35.025±5.137     |
| HDL-C, mmol/L              | 2.824±0.138      | 2.853±0.375      |
| LDL-C, mmol/L              | 8.355±0.679      | 9.040±0.621      |
| Fast blood glucose, mmol/L | 7.13±0.509       | 7.36±0.497       |
| Blood uric acid, μmol/L    | 110.382±42.352   | 115.420±28.774   |

SBP, systolic blood pressure, HDL-C, high-density lipoprotein cholesterol, LDL-C, low-density lipoprotein cholesterol. were presented as mean ± SD, \*p <0.05 vs. the NC-AAV9+Nicotine group. (n=10).
